# Supplementary material for: Fast self-healing solid polymer electrolyte with high ionic conductivity for lithium metal batteries
Source: Royal Society of Chemistry journal article supplement (doi:10.1039/d1nj06193c), 2022-01-01
Supplement: d1nj06193c1.pdf [file d1nj06193c1.pdf]

## **Fast self-healing solid polymer electrolyte with high ionic conductivity for Lithium metal batteries**

Ling-Jun Zhang<sup>a</sup>, Lu Zhou<sup>a</sup>, Yang Yan<sup>b\*</sup>, Ming-Xing Wu<sup>a\*</sup> and Na Wu<sup>a\*</sup>

<sup>a</sup> Key Laboratory of Inorganic Nanomaterials of Hebei Province, College of Chemistry and Material Science, Hebei Normal University, Shijiazhuang 050024, China

<sup>b</sup> State Key Laboratory of Fine Chemicals, Dalian University of Technology, Panjin 124221, Liaoning, China

\*Correspondence author. E-mail: [yanyang@dlut.edu.cn](mailto:yanyang@dlut.edu.cn); [mingxing.wu@hebtu.edu.cn](mailto:mingxing.wu@hebtu.edu.cn); [willywu@hebtu.edu.cn](mailto:willywu@hebtu.edu.cn)

### **Experimental details**

**Materials.** Thermoplastic polyurethane (TPU, yantaiwanhua, 1190A): 10 wt%, dissolving in anhydrous DMSO (Mw=106, Aldrich); amino terminated poly(dimethylsiloxane) (N-PDMS, Mw=1,500, Aldrich); Isophorone diisocyanate (IPDI, Aldrich); Chloroform (AR, Aldrich);

Liquid electrolytes: 2M LiClO<sub>4</sub> (or LiTFSI or LiBF<sub>4</sub>) in diethyl carbonate/dimethyl carbonate/ethylene carbonate with a ratio of 1:1:1(v/v/v).

**Synthesis.** The self-healable solid polymer electrolytes (SHSPE) were prepared through the condensation of N-PDMS, TPU and IPDI in hot chloroform solutions (~80 °C) with different liquid electrolytes. In the condensation reaction, the mass ratio of N-PDMS, TPU and IPDI is 20:1:1. The volume ratio of the liquid electrolytes and the chloroform is 1:5. After being condensational polymerized for about 12 h, the above solution was cooled down naturally. Then the SHSPEs were obtained by drop-casting the above cooled solution on the glass tablets with clean surfaces and kept in an oven (~100 °C) for 1h in the super dry room (the dew point temperature < -70 °C) for the later tests.

**Materials Characterization.** The morphology of the films was observed by scanning electron microscopy (SEM JEOL 6701F). The structure of the films was studied by Fourier transform infrared spectroscopy (FT-IR, 400-4000  $\text{cm}^{-1}$ ) and powder X-ray diffraction (XRD). The thermal stability of the polymer film was studied by thermogravimetric analysis (TGA, 30 to 750  $^{\circ}\text{C}$  at 10  $^{\circ}\text{C}$   $\text{min}^{-1}$ ) and differential scanning calorimetry (DSC, -160 to 100  $^{\circ}\text{C}$  at 10  $^{\circ}\text{C}$   $\text{min}^{-1}$ ).

**Electrochemical Tests.** The ionic conductivity and activation energy of the polymer membrane were calculated from the electrochemical impedance spectroscopy (EIS) of the stainless-steel (SS)/SHSPE/SS model in the frequency range of 0.1~1 M Hz. According to the Eq. (C):  $\sigma = h/SR$ , the  $\sigma$  of the SHSPE can be obtained.  $h$  (cm) is thickness of the SHSPE,  $S$  ( $\text{cm}^2$ ) is the contact area ( $\Phi = 1.25$  cm) between the stainless steel and the SHSPE,  $R$  ( $\Omega$ ) is the impedance measured by EIS). According to the Arrhenius Eq. (D):  $\sigma = A \exp(-E_a/RT)$ , ( $A$ : frequency factor,  $R$ : molar gas constant,  $T$ : absolute temperature)  $E_a$  is obtained. The electrochemical stability of SHSPE was determined by linear sweep voltammetry (LSV) with SS/SHSPE/Li as the model.

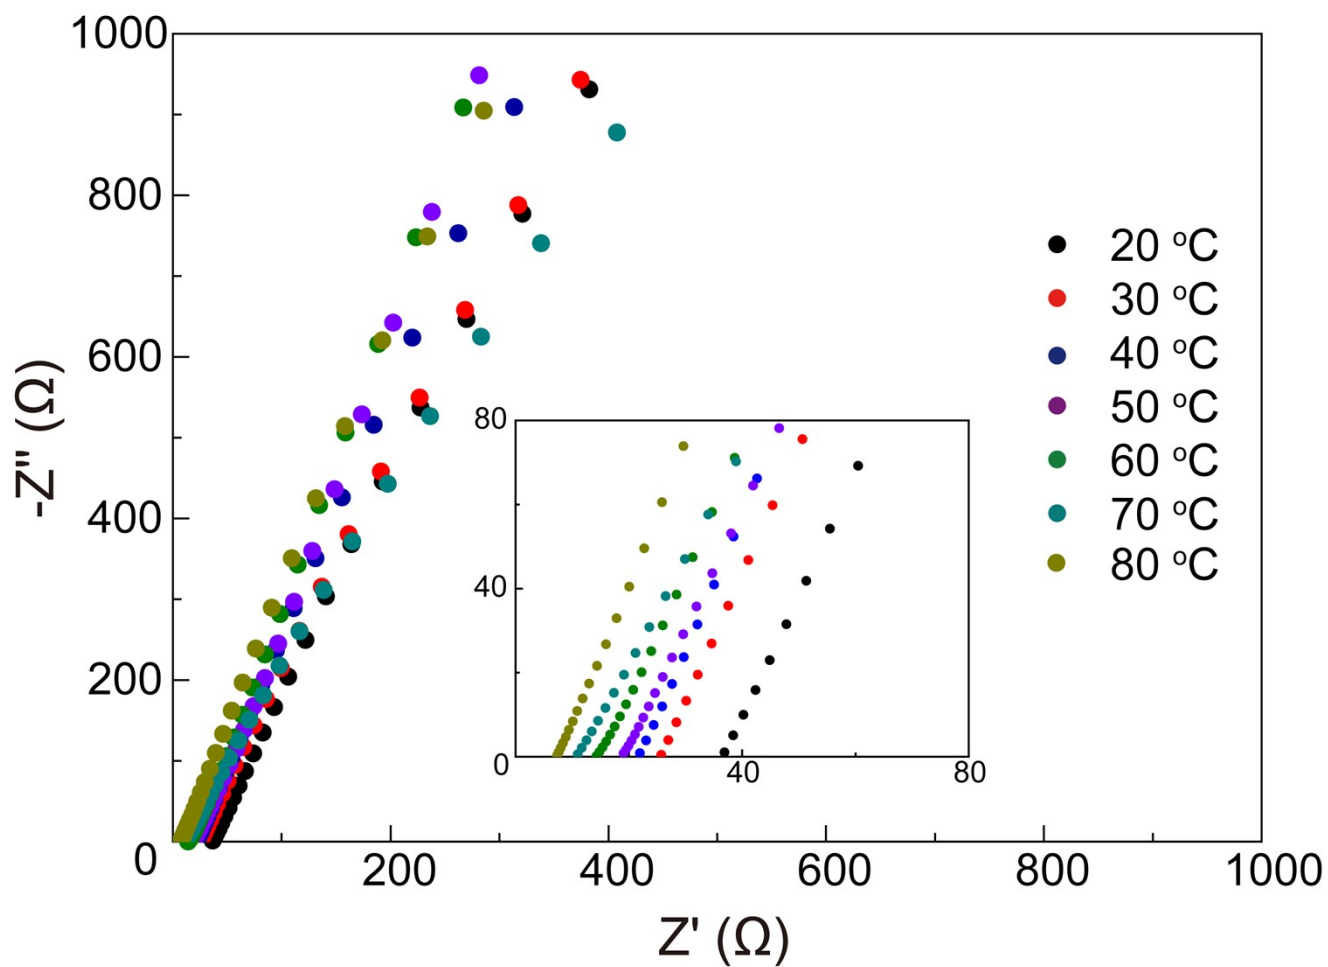

**Figure S1** EIS measurements of the SHSPE ranging from 20 to 80 °C.

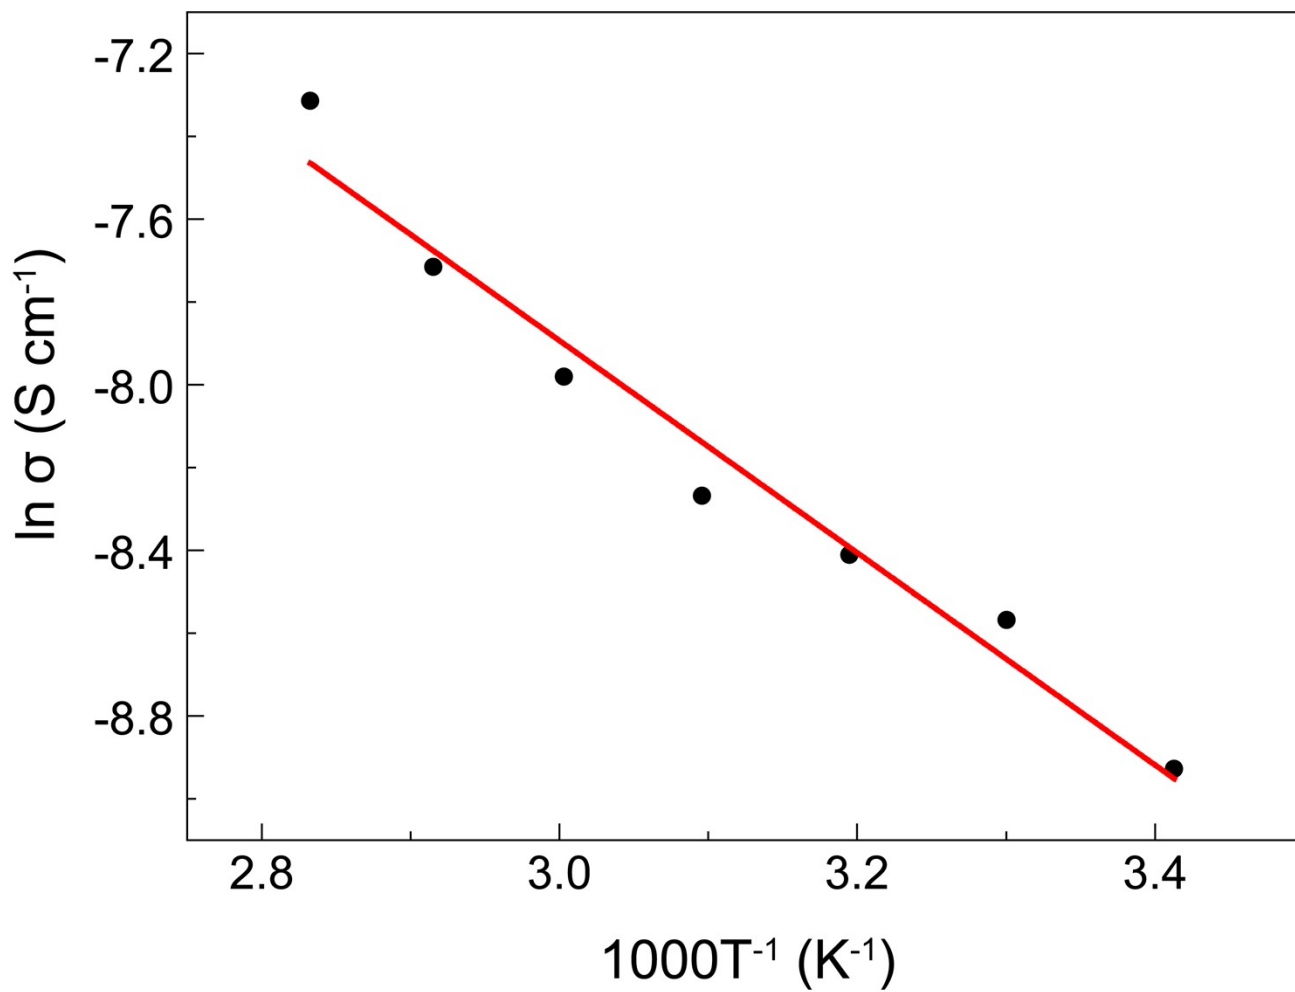

**Figure S2** Log plot and linear fit of SHSPE  $\sigma$  vs. temperature ranging from 20 °C to 80 °C.
